# Supplementary material
Source: PubMed Central journal article supplement (PMC6487902)
Supplement: jamasurg-154-590-s001.pdf [file jamasurg-154-590-s001.pdf]

## Supplementary Online Content

Branch-Elliman W, O'Brien W, Strymish J, Itani K, Wyatt C, Gupta K. Association of duration and type of surgical prophylaxis with antimicrobial-associated adverse events. *JAMA Surg*. Published online April 24, 2019. doi:10.1001/jamasurg.2019.0569

**eFigure 1.** Mean duration of surgical prophylaxis by VA facility

**eFigure 2.** Incidence of acute kidney injury following cardiac surgery, stratified by surgical prophylaxis regimen and duration of prophylaxis

**eTable.** Risk of postoperative acute kidney injury and surgical site infection after receipt of single versus combination prophylaxis in patients undergoing cardiac surgery

This supplementary material has been provided by the authors to give readers additional information about their work.

**eFigure 1.** Mean duration of surgical prophylaxis by VA facility

Facilities ranged from a minimum of 1.01 hours of post-operative prophylaxis and a maximum of 50.1 hours. The 5<sup>th</sup> percentile was 7.58 hours and the 95<sup>th</sup> 27.0 hours.

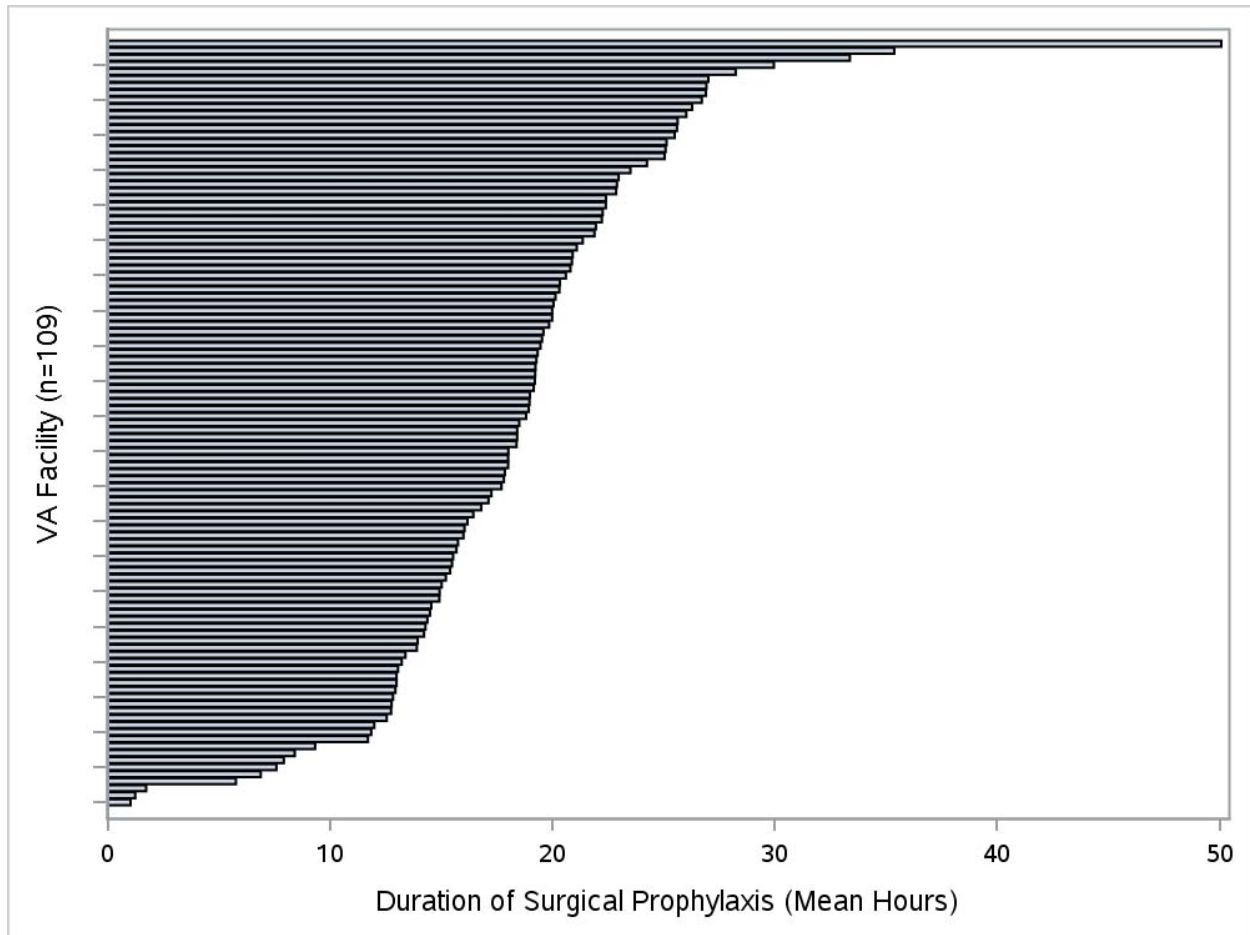

**eFigure 2.** Incidence of acute kidney injury following cardiac surgery, stratified by surgical prophylaxis regimen and duration of prophylaxis

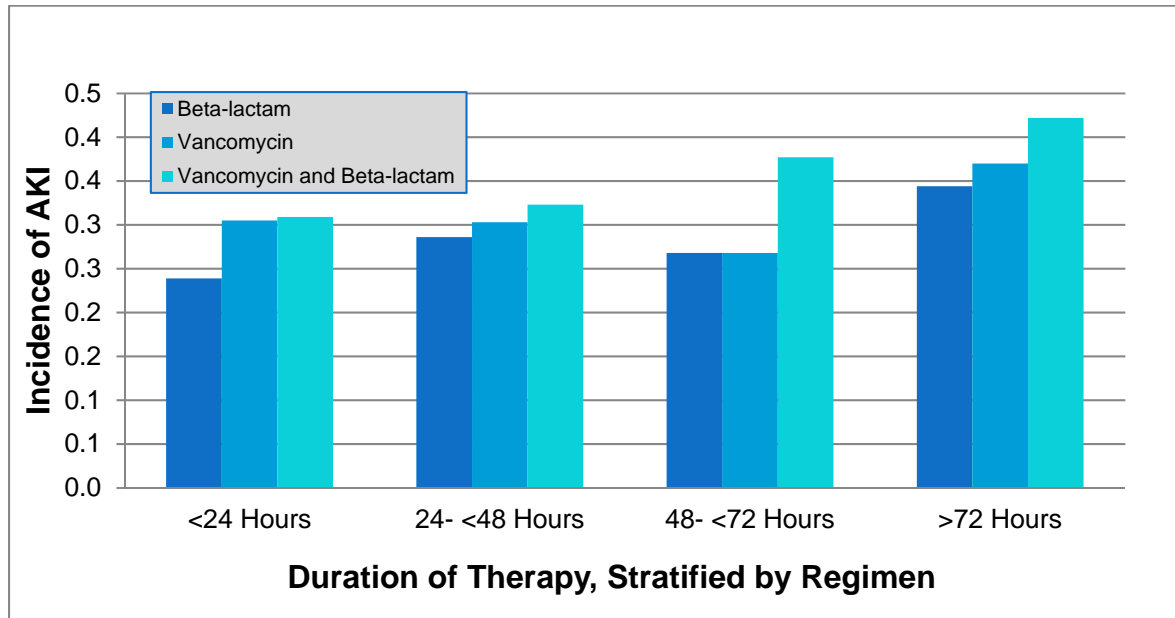

**eTable.** Risk of postoperative acute kidney injury and surgical site infection after receipt of single versus combination prophylaxis in patients undergoing cardiac surgery

| <b>Variable</b> | <b>Adjusted Risk Ratio (95%CI)</b> | <b>Number Needed to Harm/Treat*</b> |
|-----------------|------------------------------------|-------------------------------------|
| Any AKI         | 1.20 (1.15-1.25)                   | 18.69                               |
| AKI Stage 1     | 1.20 (1.15, 1.26)                  | 20.79                               |
| AKI Stage 2     | 1.30 (1.12, 1.52)                  | 87.72                               |
| AKI Stage 3     | 1.47 (1.19-1.82)                   | 116.28                              |
| SSI             | 0.62 (0.48, 0.81)                  | 166.67*                             |
